# Supplementary material for: Heteroaggregates of Polystyrene Nanospheres and Organic Matter: Preparation, Characterization and Evaluation of Their Toxicity to Algae in Environmentally Relevant Conditions
Source: PubMed Central journal article supplement (PMC7918465; doi:10.3390/nano11020482), 2021-02-13
Supplement: nanomaterials-11-00482-s001.pdf [file nanomaterials-11-00482-s001.pdf]

Supplementary Information

# Heteroaggregates of Polystyrene Nanospheres and Organic Matter: Preparation, Characterization and Evaluation of Their Toxicity to Algae in Environmentally Relevant Conditions

Laura Rowenczyk <sup>1,\*</sup>, Joséphine Leflaive <sup>2,\*</sup>, Fanny Clergeaud <sup>2</sup>, Antoine Minet <sup>2</sup>, Jessica Ferriol <sup>2</sup>, Laury Gauthier <sup>2</sup>, Julien Gigault <sup>3</sup>, Florence Mouchet <sup>2</sup>, David Ory <sup>2</sup>, Eric Pinelli <sup>2</sup>, Magali Albignac <sup>1</sup>, Clément Roux <sup>1</sup>, Anne Françoise Mingotaud <sup>1</sup>, Jérôme Silvestre <sup>2</sup>, Loïc Ten-Hage <sup>2</sup> and Alexandra ter Halle <sup>1</sup>

- <sup>1</sup> Laboratoire des IMRCP, Université de Toulouse, CNRS UMR 5623, Université Toulouse III - Paul Sabatier, 118 route de Narbonne, 31062 Toulouse Cedex 09, France; albignac@chimie.ups-tlse.fr (M.A.); c.roux@chimie.ups-tlse.fr (C.R.); afmingo@chimie.ups-tlse.fr (A.F.M.); ter-halle@chimie.ups-tlse.fr (A.T.H.)
- <sup>2</sup> Laboratoire Ecologie Fonctionnelle et Environnement, CNRS, Université Paul Sabatier, 31062 Toulouse, France; fanny.clergeaud@hotmail.fr (F.C.); minet.antoine.etu@gmail.com (A.M.); jessica.ferriol@univ-tlse3.fr (J.F.); laury.gauthier@univ-tlse3.fr (L.G.); florence.mouchet@toulouse-inp.fr (F.M.); david-ory@hotmail.com (D.O.); pinelli@ensat.fr; pinelli@ensat.fr (E.P.); jerome.silvestre@ensat.fr (J.S.); loic.tenhage@univ-tlse3.fr (L.T.H.)
- <sup>3</sup> Laboratoire TAKUVIK, CNRS, Laval University, Department of Chemistry, 1045 avenue de La Médecine - Québec, QC, G1V 0A6 Canada; julien.gigault@takuvik.ulaval.ca
- \* Correspondence: lau.rowenczyk@gmail.com (L.R.); josephine.leflaive@univ-tlse3.fr (J.L.)

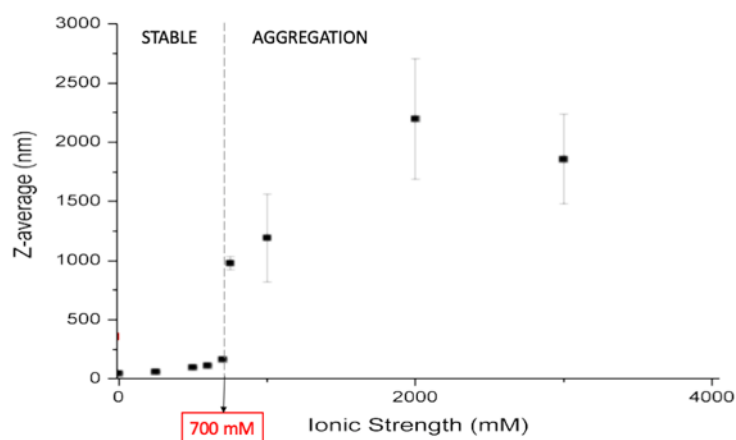

**Figure S1:** Size of the PS50 dispersion as a function of the ionic strength (with monovalent ions, KCl).

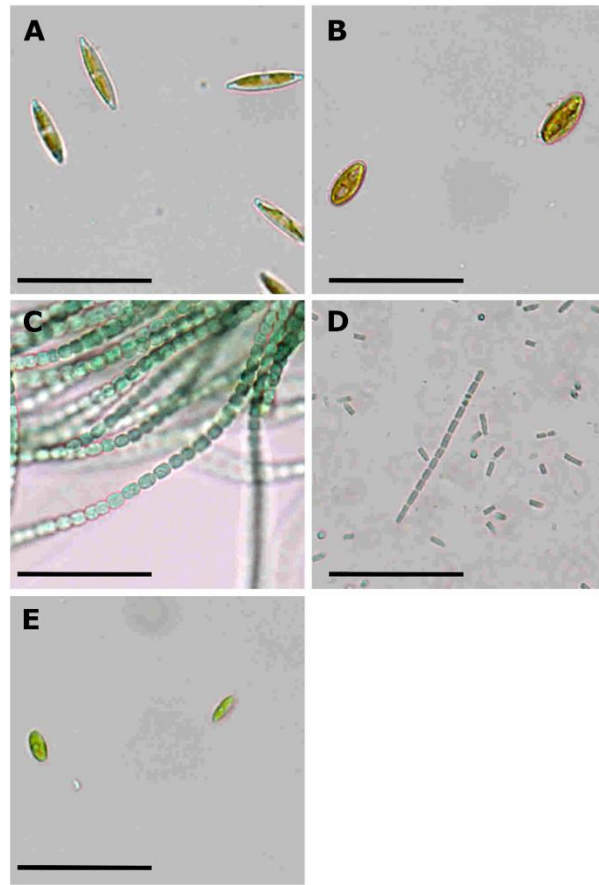

**Figure S2.** Micrographs of the 5 algal strains used in this study: *Nitzschia palea* (A), *Gomphonema parvulum* (B), *Nostoc* sp. (C), *Komvophoron* sp. (D) and *Scendesmus obliquus* (E). Scale bar represents 10  $\mu\text{m}$ .

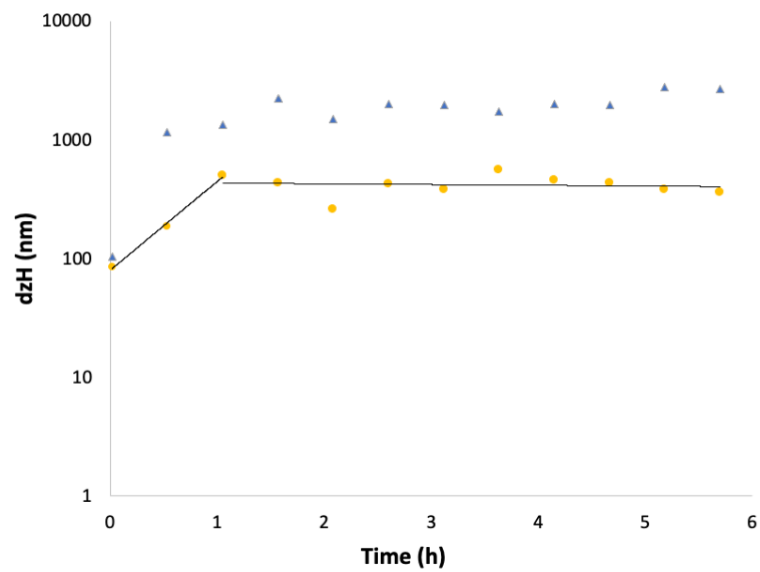

**Figure S3:** Kinetics of aggregation of PS50 (blue triangles) and PS50-HA (orange circles) in NaCl solution ( $700 \text{ mmol.L}^{-1}$ , pH 7) : the first slope corresponding to a fast aggregation regime and the second one to a rearrangement phase.

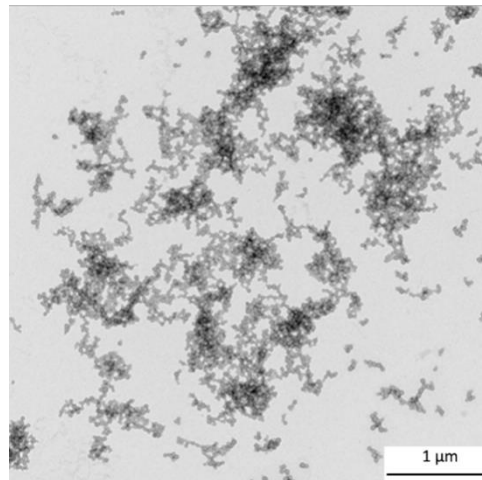

**Figure S4:** TEM observations of (a) PS-50 homoaggregation ( $I = 700 \text{ mmol.L}^{-1}$ ).

**Table S1:** Characterization of biological media.

|              | T<br>°C | pH   | Conductivity<br>mS/cm | Ionic strength (I)<br>mmol.L <sup>-1</sup> |
|--------------|---------|------|-----------------------|--------------------------------------------|
| <b>BGII</b>  | 16.7    | 7.68 | 2.23                  | 23.77                                      |
| <b>COMBO</b> | 16.1    | 7.88 | 0.338                 | 5.98                                       |

**Table S2:** Characterization of the nanospheres by DLS.

|              | Z-Average<br>nm | PdI   | Intensity<br>Mean<br>nm | Number<br>Mean<br>nm | Volume<br>Mean<br>nm | Derived<br>Count Rate<br>kcps |
|--------------|-----------------|-------|-------------------------|----------------------|----------------------|-------------------------------|
| <b>PS50</b>  | 44.59           | 0.050 | 47.21                   | 35.48                | 40.44                | 15691.2                       |
|              | 45.22           | 0.048 | 48.01                   | 35.35                | 40.60                | 15828.6                       |
|              | 45.67           | 0.050 | 48.63                   | 35.42                | 40.83                | 15635.8                       |
| <b>PS350</b> | 347.0           | 0.019 | 364.1                   | 320.5                | 379.8                | 16182.4                       |
|              | 351.6           | 0.099 | 355.6                   | 329.7                | 365.5                | 16583.1                       |
|              | 347.0           | 0.158 | 346.2                   | 322.5                | 354.9                | 16165.7                       |
|              |                 |       |                         |                      |                      |                               |

**Table S3:** Zeta potential of particles in the exposure media after adjustment of the pH to 7 (10 mg/L). In brackets are reported the standard deviation values ( $n = 4$ ).

| Particles      | Zeta potential<br>in COMBO exposition medium<br>(mV) | Zeta potential<br>In BG11 exposition medium<br>(mV) |
|----------------|------------------------------------------------------|-----------------------------------------------------|
| <b>PS350</b>   | -34.7 ( $\pm 1.3$ )                                  | -48.7 ( $\pm 2.1$ )                                 |
| <b>PS50</b>    | -24.3 ( $\pm 1.3$ )                                  | -30.6 ( $\pm 1.9$ )                                 |
| <b>PS50-HA</b> | -25.2 ( $\pm 1.4$ )                                  | -37.1 ( $\pm 3.4$ )                                 |

**Table S4:** Chemical composition of COMBO algal exposure media.

| Ingredients                                    | Quantity<br>(mg.L <sup>-1</sup> ) |
|------------------------------------------------|-----------------------------------|
| CaCl <sub>2</sub> . 2H <sub>2</sub> O (147.02) | 36.76                             |

|                                                                              |       |
|------------------------------------------------------------------------------|-------|
| MgSO <sub>4</sub> . 7H <sub>2</sub> O (246.48)                               | 36.97 |
| KH <sub>2</sub> PO <sub>4</sub> (136.09)                                     | 8.71  |
| NaNO <sub>3</sub> (84 .99)                                                   | 85.01 |
| NaHCO <sub>3</sub> (84.01)                                                   | 12.60 |
| Na <sub>2</sub> O <sub>2</sub> SiO <sub>2</sub> . 2H <sub>2</sub> O (218.16) | 21.84 |
| H <sub>3</sub> BO <sub>3</sub> (61.83)                                       | 24.00 |
| MnCl <sub>2</sub> . 4H <sub>2</sub> O (197.844)                              | 0.18  |
| CuSO <sub>4</sub> . 5 H <sub>2</sub> O (249.612)                             | 0.001 |
| ZnSO <sub>4</sub> . 7 H <sub>2</sub> O (287.54)                              | 0.022 |
| CoCl <sub>2</sub> . 6 H <sub>2</sub> O (237.839)                             | 0.01  |
| Na <sub>2</sub> MoO <sub>4</sub> . 2 H <sub>2</sub> O (241.92)               | 0.022 |
| NaVO <sub>2</sub> (121.93)                                                   | 1.20  |
| Na <sub>2</sub> EDTA. 2H <sub>2</sub> O * (328.25)                           | 4.36  |
| FeCl <sub>3</sub> . 6H <sub>2</sub> O (270.30)                               | 1.50  |

Table S5: Chemical composition of BG11 algal exposure media.

| Ingredients                                                              | Quantity<br>(mg.L <sup>-1</sup> ) |
|--------------------------------------------------------------------------|-----------------------------------|
| CaCl <sub>2</sub> . 2H <sub>2</sub> O (147.02)                           | 36.0                              |
| MgSO <sub>4</sub> . 7H <sub>2</sub> O (246.48)                           | 75.0                              |
| KH <sub>2</sub> PO <sub>4</sub> (136.09)                                 | 28.6                              |
| NaNO <sub>3</sub> (84 .99)                                               | 1500.0                            |
| Na <sub>2</sub> CO <sub>3</sub> 10H <sub>2</sub> O (286.14)              | 54.0                              |
| H <sub>3</sub> BO <sub>3</sub> (61.83)                                   | 29.0                              |
| C <sub>6</sub> H <sub>8</sub> O <sub>7</sub> . H <sub>2</sub> O (210.06) | 6.0                               |
| MnCl <sub>2</sub> . 4H <sub>2</sub> O (197.844)                          | 1.8                               |
| CuSO <sub>4</sub> . 5 H <sub>2</sub> O (249.612)                         | 0.1                               |
| ZnSO <sub>4</sub> . 7 H <sub>2</sub> O (287.54)                          | 0.2                               |
| Co(NO <sub>3</sub> ) <sub>2</sub> . 6H <sub>2</sub> O (290.933)          | 0.05                              |
| Na <sub>2</sub> MoO <sub>4</sub> . 2 H <sub>2</sub> O (241.92)           | 0.4                               |
| Na <sub>2</sub> EDTA. 2H <sub>2</sub> O * (328.25)                       | 1.0                               |
| Fe(III)(NH <sub>4</sub> ) <sub>3</sub> citrate                           | 6.0                               |
